# Supplementary material for: HapX Mediates Iron Homeostasis in the Pathogenic Dermatophyte Arthroderma benhamiae but Is Dispensable for Virulence
Source: PubMed Central journal article supplement (PMC4784894; doi:10.1371/journal.pone.0150701), 2016-03-09
Supplement: pone.0150701.s007.pdf [file pone.0150701.s007.pdf]

| <b>Primer</b> | <b>Sequence (5'-3')<sup>a</sup></b>                     | <b>Reference</b> |
|---------------|---------------------------------------------------------|------------------|
| AbenHAPX-1    | CTGCTGGAAGGGC <u>cc</u> GCGGAGGACCTG                    | This study       |
| AbenHAPX-2    | GAAGTTGACA <u>agcTt</u> ATACTCCGTCTCTC                  | This study       |
| AbenHAPX-3    | GAAGATTTGCTGAT <u>ggatcc</u> TAAAAGCTACG                | This study       |
| AbenHAPX-4    | CAGATTTTTGGC <u>gGCcgc</u> GCTGATCATTAC                 | This study       |
| AbenHAPX-5    | ATATA <u>gATC</u> ITTA <u>CTT</u> AGAATCAGCAAATCTTCGATC | This study       |
| AbenHAPX-9    | CACCGGTAGATC <u>ggGCcc</u> AAAGATAGACAAG                | This study       |

<sup>a</sup> The lowercase letters represent nucleotide exchanges introduced to create the underlined restriction

sites.
