# Supplementary material for: HapX Mediates Iron Homeostasis in the Pathogenic Dermatophyte Arthroderma benhamiae but Is Dispensable for Virulence
Source: PubMed Central journal article supplement (PMC4784894; doi:10.1371/journal.pone.0150701), 2016-03-09
Supplement: pone.0150701.s008.pdf [file pone.0150701.s008.pdf]

| <b>Primer</b> | <b>Sequence (5'-3')</b> | <b>Reference</b> |
|---------------|-------------------------|------------------|
| AbenACT-for   | ATCTACGAAGGTTTCGCCCT    | This study       |
| AbenACT-rev   | GCAGTCTGGATCTCCTCCTG    | This study       |
| AbenHAPX-for  | CGTGCATCTACTCGTCAGGA    | This study       |
| AbenHAPX-rev  | CACAGCTGAGCGTAATTGGA    | This study       |
| AbenSREA-for  | GTCTGAGAATGGAGGACCCA    | This study       |
| AbenSREA-rev  | CGTTTCTTAGTGTTGGGGGA    | This study       |
| AbenHEMA-for  | TCTACCCCCAGCTACAATGG    | This study       |
| AbenHEMA-rev  | TTGACTGCTCTGGTGTGGAG    | This study       |
| AbenCCCA-for  | CCATACAACCTCCCAGAGGA    | This study       |
| AbenCCCA-rev  | AGTATCCCAGTGCAAGGGTG    | This study       |
| AbenSIDA-for  | TGAGCTCTTTAACCCCGAGA    | This study       |
| AbenSIDA-rev  | CTTGGAGATCAGGCAGGAAG    | This study       |
| AbenSIDC-for  | ATTGAGCCCGTAGTGTGGTC    | This study       |
| AbenSIDC-rev  | ACCTTGATAGCGCTGATGCT    | This study       |
| AbenCYCA-for  | TTCCTGCCACACCCTAGAAG    | This study       |
| AbenCYCA-rev  | TCGGTGTAGGAGAAACCCTC    | This study       |
| AbenLYSF-for  | TCGGCAATATTTTCTCCAGG    | This study       |
| AbenLYSF-rev  | CTTCGTCGTACATCCCAGGT    | This study       |
| AbenHMG1-for  | CCATGGCTACCACTGAAGGT    | This study       |
| AbenHMG1-rev  | ACTGGCCCTCTTCAGAGTCA    | This study       |
