# Supplementary material for: HapX Mediates Iron Homeostasis in the Pathogenic Dermatophyte Arthroderma benhamiae but Is Dispensable for Virulence
Source: PubMed Central journal article supplement (PMC4784894; doi:10.1371/journal.pone.0150701), 2016-03-09
Supplement: pone.0150701.s009.pdf [file pone.0150701.s009.pdf]

| Protein                                                       | Function                        | <i>A. fumigatus</i> | <i>A. benhamiae</i><br>homologue | Identity<br>(%) |
|---------------------------------------------------------------|---------------------------------|---------------------|----------------------------------|-----------------|
| <b>Proteins involved in reductive iron assimilation (RIA)</b> |                                 |                     |                                  |                 |
| FetC                                                          | ferroxidase                     | AFUA_5G03790        | ARB_02127                        | 58              |
| FreB                                                          | ferric reductase                | AFUA_1G17270        | ARB_02049                        | 45              |
| FtrA                                                          | iron transporter                | AFUA_5G03800        | ARB_02126                        | 56              |
| <b>Proteins involved in siderophore biosynthesis</b>          |                                 |                     |                                  |                 |
| EstB                                                          | TAFC esterase                   | AFUA_3G03660        | ARB_01286                        | 28              |
| PptA                                                          | phosphopantetheinyl transferase | AFUA_2G08590        | ARB_04924                        | 50              |
| SidA                                                          | L-ornithine $N^5$ -oxygenase    | AFUA_2G07680        | ARB_07687                        | 60              |
| SidC                                                          | ferricrocin NRPS                | AFUA_1G17200        | ARB_07686                        | 27              |
| SidD                                                          | fusarinine C NRPS               | AFUA_3G03420        | ARB_05131                        | 38              |
| SidF                                                          | hydroxyornithine transacylase   | AFUA_3G03400        | ARB_06708                        | 48              |
| SidG                                                          | fusarinine C acetyltransferase  | AFUA_3G03650        | ARB_05896                        | 36              |
| SidH                                                          | mevalonyl-CoA hydratase         | AFUA_3G03410        | ARB_00114                        | 46              |
| SidI                                                          | mevalonyl-CoA ligase            | AFUA_1G17190        | ARB_06663                        | 45              |
| SidL                                                          | GNAT-type acetyltransferase     | AFUA_1G04450        | ARB_01365                        | 42              |
| <b>Siderophore-iron transporters (SITs)</b>                   |                                 |                     |                                  |                 |
| MirB                                                          | siderophore iron transporter    | AFUA_3G03640        | ARB_05150                        | 28              |
| MirC                                                          | siderophore transporter         | AFUA_2G05730        | ARB_03854                        | 68              |
| CccA                                                          | vacuolar iron importer          | AFUA_4G12530        | ARB_03795                        | 66              |
| <b>Regulatory proteins</b>                                    |                                 |                     |                                  |                 |
| HapX                                                          | bZIP transcription factor       | AFUA_5G03920        | ARB_06811                        | 48              |
| HapB                                                          | subunit of CBC                  | AFUA_2G14720        | ARB_03649                        | 74              |
| HapC                                                          | subunit of CBC                  | AFUA_1G03840        | ARB_01301                        | 63              |
| HapE                                                          | subunit of CBC                  | AFUA_6G05300        | ARB_04269                        | 77              |
| SreA                                                          | GATA transcription factor       | AFUA_5G11260        | ARB_03037                        | 38              |
| SrbA                                                          | bHLH-LZ transcription factor    | AFUA_2G01260        | ARB_05762                        | 45              |
| PacC                                                          | C2H2 transcription factor       | AFUA_3G11970        | ARB_07827                        | 54              |
| MpkA                                                          | MAP kinase A                    | AFUA_4G13720        | ARB_07820                        | 81              |
| AcuM                                                          | Zn cluster transcription factor | AFUA_2G12330        | ARB_04776                        | 61              |
